# Supplementary material for: Fabrication of Ni2P Cocatalyzed CdS Nanorods with a Well-Defined Heterointerface for Enhanced Photocatalytic H2 Evolution
Source: MDPI journal article supplement (doi:10.3390/catal12040417), 2022-04-08
Supplement: s1 [file s1]

Archive with 1 entries (1 files):
- catalysts-1652999-supplementary.pdf
