# Supplementary material for: Fabrication of Ni2P Cocatalyzed CdS Nanorods with a Well-Defined Heterointerface for Enhanced Photocatalytic H2 Evolution
Source: MDPI journal article supplement (doi:10.3390/catal12040417), 2022-04-08
Supplement: s1 [file s1 › catalysts-1652999-supplementary.pdf]

Supplementary Materials for

# **Fabrication of Ni<sub>2</sub>P Cocatalyzed CdS Nanorods with a Well-Defined Heterointerface for Enhanced Photocatalytic H<sub>2</sub> Evolution**

Mengdie Cai <sup>1,\*†</sup>, Siyu Cao <sup>1,†</sup>, Zhenzhen Zhuo <sup>1</sup>, Xue Wang <sup>1</sup>, Kangzhong Shi <sup>2</sup>,  
Qin Cheng <sup>1</sup>, Zhaoming Xue <sup>1</sup>, Xi Du <sup>2,\*</sup>, Cheng Shen <sup>1</sup>, Xianchun Liu <sup>1</sup>, Rui Wang <sup>1</sup>, Lu Shi <sup>1</sup>  
and Song Sun <sup>1,\*</sup>

<sup>1</sup> School of Chemistry and Chemical Engineering, Anhui University, Hefei  
230601, China

<sup>2</sup> Eastman Shuangwei Fibers Company Limited, Hefei 230601, China

\* Corresponding author. E-mail addresses:

caimengdie1987@163.com (M.C.); dux@esfcl.com (X.D.); suns@ustc.edu.cn (S.S.)

† These authors contributed equally to this work.

## **1. Experimental**

CdS-H nanoparticles were prepared by the hydrothermal method. Typically, 12.5 mmol of Cd(NO<sub>3</sub>)<sub>2</sub>·4H<sub>2</sub>O and 37.5 mmol of thiourea (NH<sub>2</sub>CSNH<sub>2</sub>) were dissolved in 60 mL of distilled water. The mixture solution was stirred for 2h and then transferred to a 100 mL Teflon-lined autoclave. The hydrothermal reaction temperature was kept at 160 °C for 24 h. Afterward, the yellow precipitate was collected by centrifugation and then washed with distilled water and ethanol six times. Finally, the product was dried in a vacuum oven (60 °C) for 24 h.

A Ni<sub>2</sub>P/CdS-H composite was prepared using the in situ phosphorization method. A total of 200 mg of as-synthesized CdS NRs were added into a mixture of NiCl<sub>2</sub>·6H<sub>2</sub>O and red phosphorous (1:4 M ratio) in 20 ml ethanolamine. After 30 min stirring, the mixed solution was transferred into 100 ml Teflon-lined stainless-steel autoclaves and kept at 180 °C for 10 h. The resulting Ni<sub>2</sub>P/CdS-H were collected, washed with distilled

water and absolute ethanol several times, and the dried in a vacuum at 60 °C. A 2% Ni<sub>2</sub>P/CdS NRs + M sample was prepared by the physical mixing method with 2% of Ni<sub>2</sub>P and CdS NRs. The pristine Ni<sub>2</sub>P nanoparticle was synthesized by using the same approach to that of Ni<sub>2</sub>P/CdS NRs except for no addition of CdS NRs. As a control, the synthesis of 1.0 wt.% Pt/CdS NRs was carried out by using a traditional photodeposition method. In brief, 100 mg of CdS NRs was ultrasonically dispersed in the 100 mL aqueous solution, containing Na<sub>2</sub>S and Na<sub>2</sub>SO<sub>3</sub> as sacrificial agents, and the appropriate amount of 0.01 g/mL H<sub>2</sub>PtCl<sub>6</sub>·6H<sub>2</sub>O solution calculated with the content of Pt in the Pt/CdS NRs was 1.0 wt.%.

### **Electrochemical tests**

The transient photocurrent was performed on an electrochemical workstation of CHI 760 E (Shanghai, China) using Pt as a counter electrode and Ag/AgCl as reference. For the preparation of the working electrode, 5 mg of the photocatalyst and 20 μL of Nafion (0.25%) solution were added to 2 mL of ethanol solution, followed by ultrasonication for 2 h. A portion (500 μL) of the suspension was transferred to a fluorine-doped tin oxide (FTO, 2 cm × 3.5 cm) glass substrate in 10 drops, and each dispersion was dried under an infrared lamp. The last step involved maintaining the FTO at 150 °C for 1 h under Ar protection. Transient photocurrent experiments were performed using electrochemical workstations and standard three-electrode batteries. Ag/AgCl, the prepared working electrode, Pt electrode, and 0.1 mol/L Na<sub>2</sub>SO<sub>4</sub> were used as the reference electrode, working electrode, counter electrode, and electrolyte, respectively. The irradiation light source was a 300 W Xe lamp. LSV test was carried out in a 0.5 M H<sub>2</sub>SO<sub>4</sub> solution in the dark with a 50 mV/s scan rate.

## 2. Results

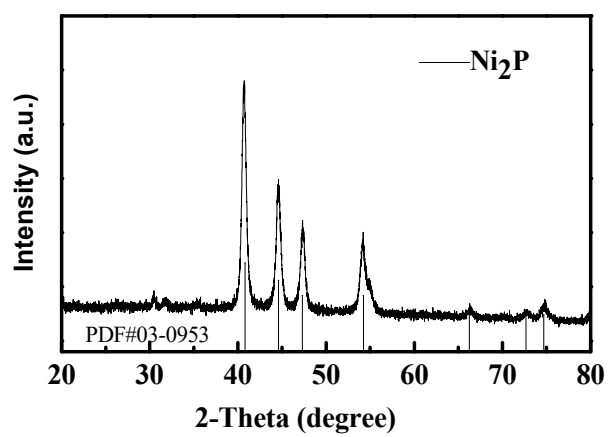

**Figure S1.** XRD pattern of the  $\text{Ni}_2\text{P}$

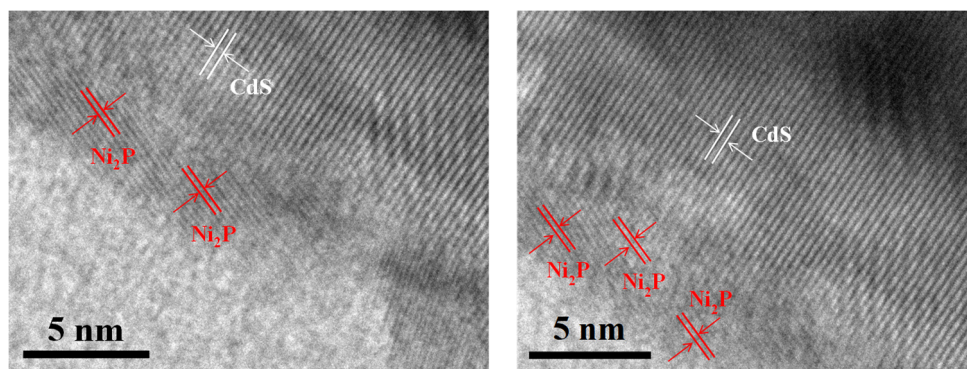

**Figure S2.** The HRTEM images of  $2\%\text{Ni}_2\text{P}/\text{CdS}$  NRs

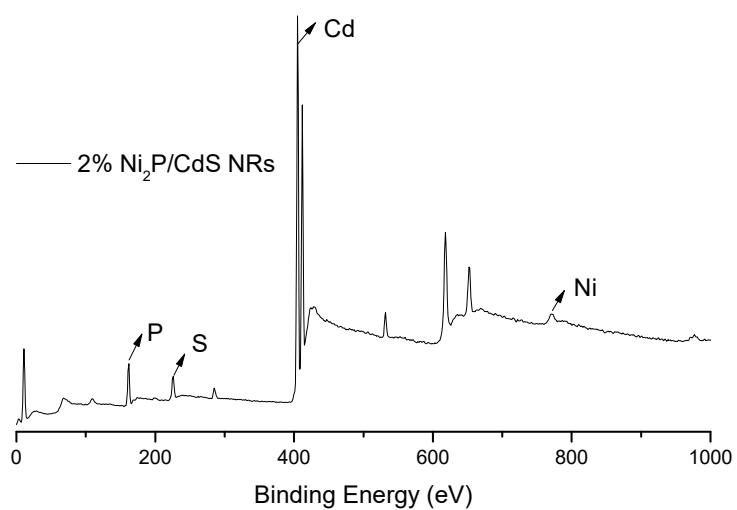

**Figure S3.** The XPS survey spectra of 2%Ni<sub>2</sub>P/CdS NRs

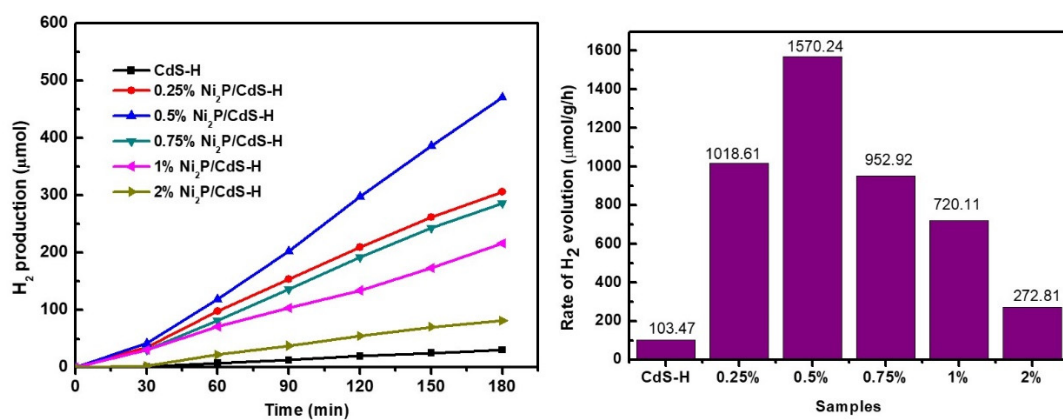

**Figure S4.** The photocatalytic H<sub>2</sub> evolution activity of as-prepared m%Ni<sub>2</sub>P/CdS-H samples

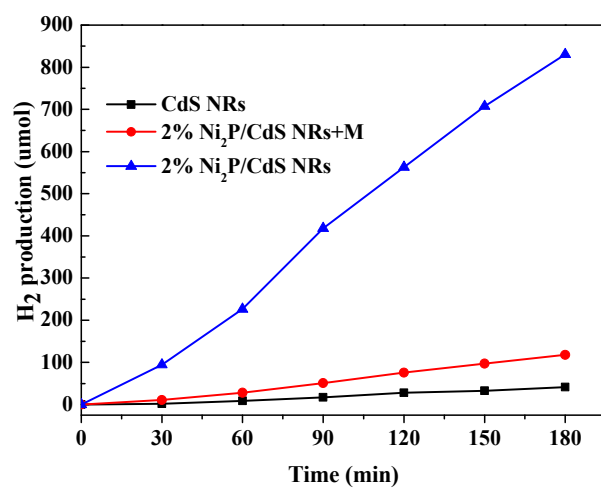

**Figure S5.** The photocatalytic H<sub>2</sub> evolution activity of CdS NRs, 2%Ni<sub>2</sub>P/CdS NRs + M and 2%Ni<sub>2</sub>P/CdS NRs

**Table S1.** Comparison on the H<sub>2</sub> evolution performance of various CdS based photocatalysts

| Catalyst                                                                        | Reactant solution                                                                                      | Light source                                                                  | Activity                                                                | Ref       |
|---------------------------------------------------------------------------------|--------------------------------------------------------------------------------------------------------|-------------------------------------------------------------------------------|-------------------------------------------------------------------------|-----------|
| <b>Ni<sub>2</sub>P-Cd<sub>0.9</sub>Zn<sub>0.1</sub>S</b>                        | 100 mL sacrificial reagents (0.7 M Na <sub>2</sub> S and 0.5 M Na <sub>2</sub> SO <sub>3</sub> )       | 300 W xenon lamp ( $\lambda \geq 400$ nm)                                     | 1.31 mmol·h <sup>-1</sup>                                               | [1]       |
| <b>Ru/CdS /Halloysite</b>                                                       | 100 ml of an aqueous 0.1 M Na <sub>2</sub> S / 0.1 M Na <sub>2</sub> SO <sub>3</sub>                   | monochromatic LED (30 W), with the maximum emission at a wavelength of 450 nm | 1.3 ± 0.1 mmol·h <sup>-1</sup> ·g <sup>-1</sup>                         | [2]       |
| <b>Co<sub>9</sub>S<sub>8</sub>/Cd/CdS</b>                                       | 10 mL aqueous solution containing 0.35 M Na <sub>2</sub> S and 0.25 M Na <sub>2</sub> SO <sub>3</sub>  | 300 W Xenon lamp ( $\lambda \geq 400$ nm)                                     | 10.42 μmol·h <sup>-1</sup>                                              | [3]       |
| <b>1%Pt/Cd<sub>0.6</sub>Zn<sub>0.4</sub>S/Cd<sub>0.1</sub>Zn<sub>0.9</sub>S</b> | 100 mL of xylose aqueous solution with 5 M NaOH                                                        | 450-nm LED with light intensity equal to 48 mW cm <sup>-2</sup>               | 3.4 mmol·h <sup>-1</sup> ·g <sup>-1</sup>                               | [4]       |
| <b>PCN-CdS-5% Ni<sub>2</sub>P</b>                                               | 100 mL of 10 vol.% triethanolamine aqueous solution                                                    | 300W Xe lamp ( $\lambda \geq 400$ nm)                                         | 2905.86 μmol·h <sup>-1</sup> ·g <sup>-1</sup>                           | [5]       |
| <b>2% Ni<sub>2</sub>P/ CdS NRs</b>                                              | 100 mL aqueous solution containing 0.35 M Na <sub>2</sub> S and 0.25 M Na <sub>2</sub> SO <sub>3</sub> | 300W Xe lamp ( $\lambda \geq 420$ nm)                                         | 260.2 μmol·h <sup>-1</sup> or 2.6 mmol·h <sup>-1</sup> ·g <sup>-1</sup> | This work |

- [1] Shao, Z.; Meng, X.; Lai, H.; Zhang, D.; Pu, X.; Su, C.; Li, H.; Ren, X.; Geng, Y. Coralline-like Ni<sub>2</sub>P decorated novel tetrapod-bundle Cd<sub>0.9</sub>Zn<sub>0.1</sub>S ZB/WZ homojunctions for highly efficient visible-light photocatalytic hydrogen evolution. *Chinese J. Catal.* **2021**, *42*, 439–449.
- [2] Stavitskaya, A.V.; Kozlova, E.A.; Kurenkova, A.Y.; Glotov, A.P.; Selischev, D.S.; Ivanov, E.V.; Kozlov, D.V.; Vinokurov, V.A.; Fakhrullin, R.F.; Lvov, Y.M. Ru/CdS Quantum Dots Templated on Clay Nanotubes as Visible-Light-Active Photocatalysts: Optimization of S/Cd Ratio and Ru Content. *Chem. Eur. J.* **2020**, *26*, 13085–13092.
- [3] Zhang, T.; Meng, F.; Cheng, Y.; Dewangan, N.; Ho, G.W.; Kawi, S. Z-scheme transition metal bridge of Co<sub>9</sub>S<sub>8</sub>/Cd/CdS tubular heterostructure for enhanced photocatalytic hydrogen evolution. *Appl. Catal. B* **2021**, *286*, 119853.
- [4] Kurenkova, A.Y.; Markovskaya, D.V.; Gerasimov, E.Y.; Prosvirin, I.P.; Cherepanova, S.V.; Kozlova, E.A. New insights into the mechanism of photocatalytic hydrogen evolution from aqueous solutions of saccharides over CdS-based photocatalysts under visible light. *Int. J. Hydrog. Energy* **2020**, *45*, 30165–30177.
- [5] Gong, Q.; Cao, S.; Zhou, Y.; Wang, R.; Jiao, W. Mesoporous g-C<sub>3</sub>N<sub>4</sub> decorated by Ni<sub>2</sub>P nanoparticles and CdS nanorods together for enhancing photocatalytic hydrogen evolution. *Int. J. Hydrog. Energy* **2021**, *46*, 21442–21453.
